# Supplementary material for: Computational Studies of 4-Formylpyridinethiosemicarbazone and Structural and Biological Studies of Its Ni(II) and Cu(II) Complexes
Source: Hindawi journal article supplement (doi:10.1155/2019/3507837), 2019-03-03
Supplement: f1 [file 3507837.f1.docx]

**Heteroatom Chemistry**

**Computational Studies of 4-formylpyridinethiosemicarbazone, Structural and Biological studies of its Ni(II)and Cu(II)complexes**

Mydhili P. Sripathi, 1 Sireesha Berely, 1 Venkata Ramana Reddy Chittireddy2

1 Department of Chemistry, Nizam College, Osmania University, Hyderabad, India

2 Department of Chemistry, Jawaharlal Nehru Technological University Hyderabad, Hyderabad, India

E-mail: vrr9@jntuh.ac.in

**Supplementary Material**

Figures

Thione Thiol-1 Thiol-2


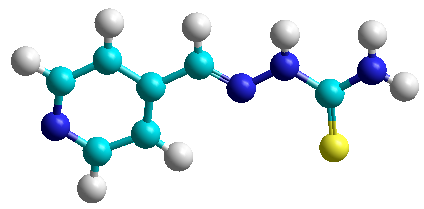

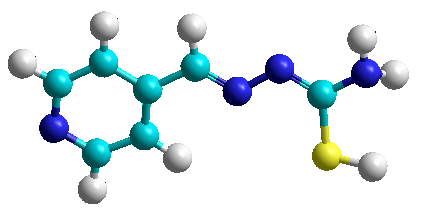

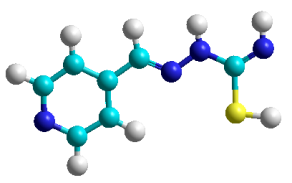


Optimized Geometry


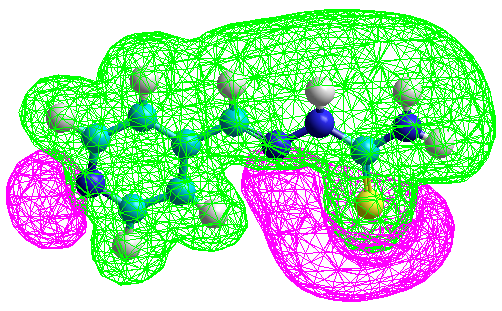

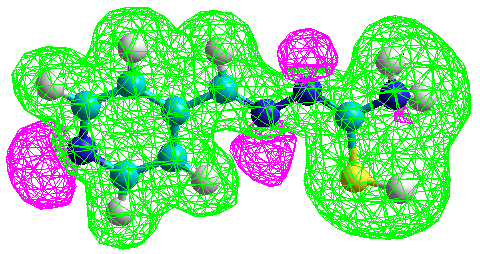

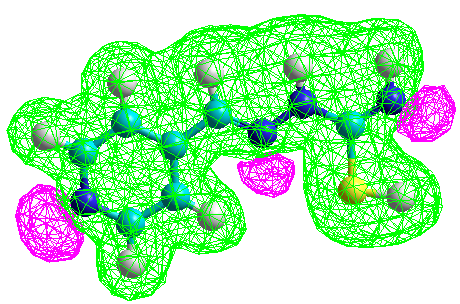


Electrostatic Potential


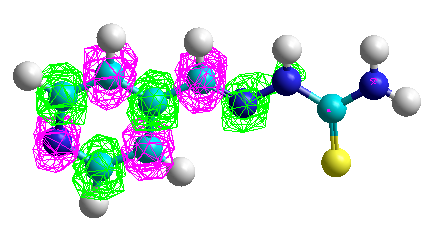

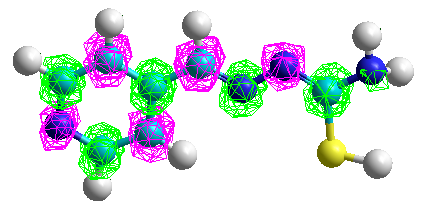

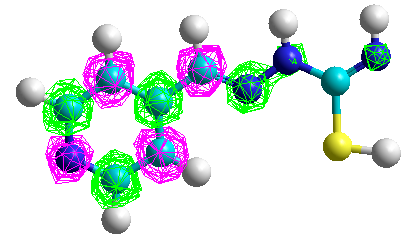


Total Spin Density


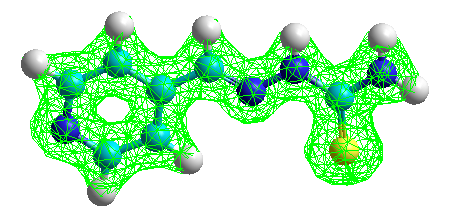

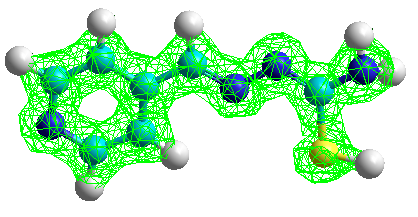

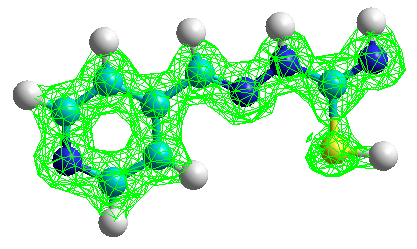


Total Charge Density


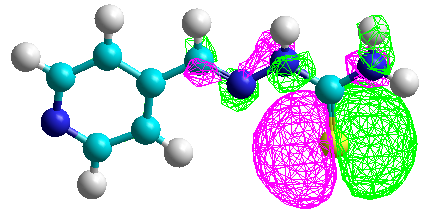

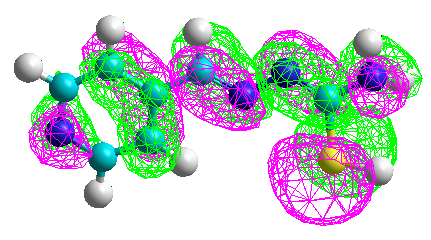

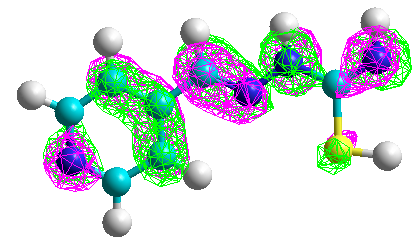


Highest Occupied Molecular Orbital


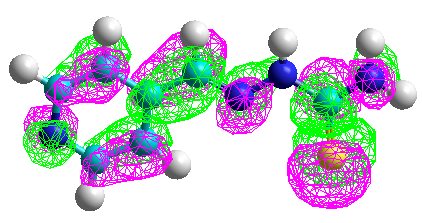

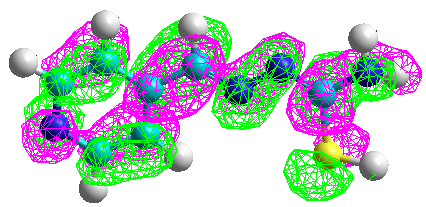

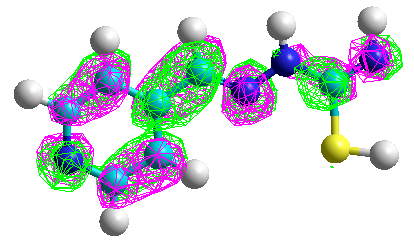


Lowest Unoccupied Molecular Orbital

Figure S1. Molecular Graphs of H4FPT (L)

**
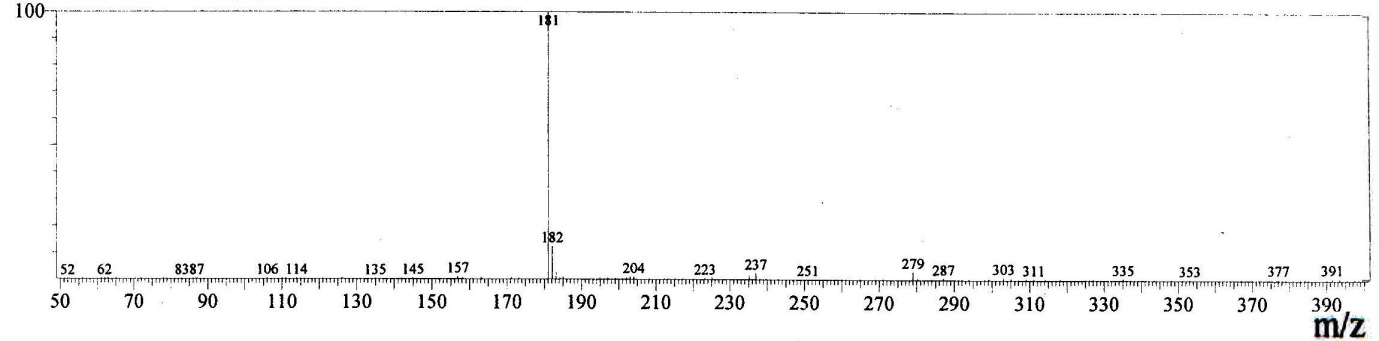
**

a. H4FPT (L)

**
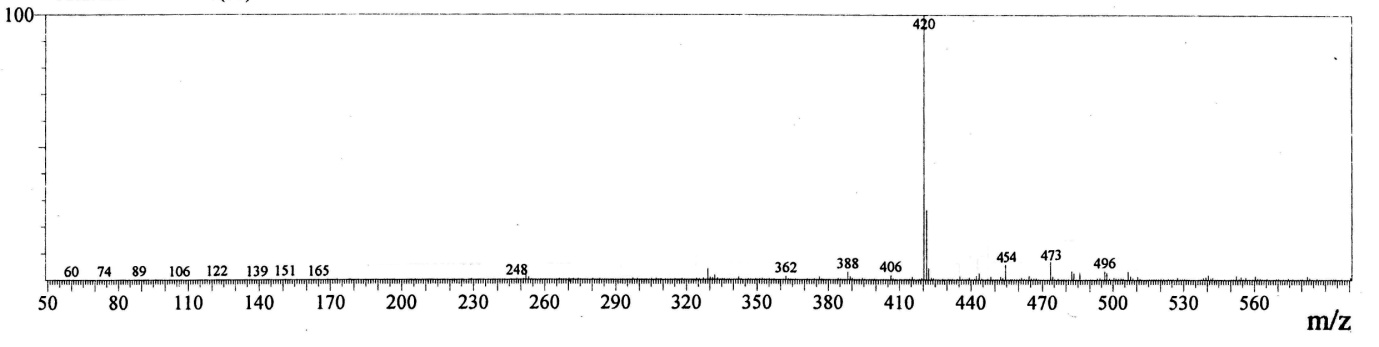
**

b. Ni(II) complex

**
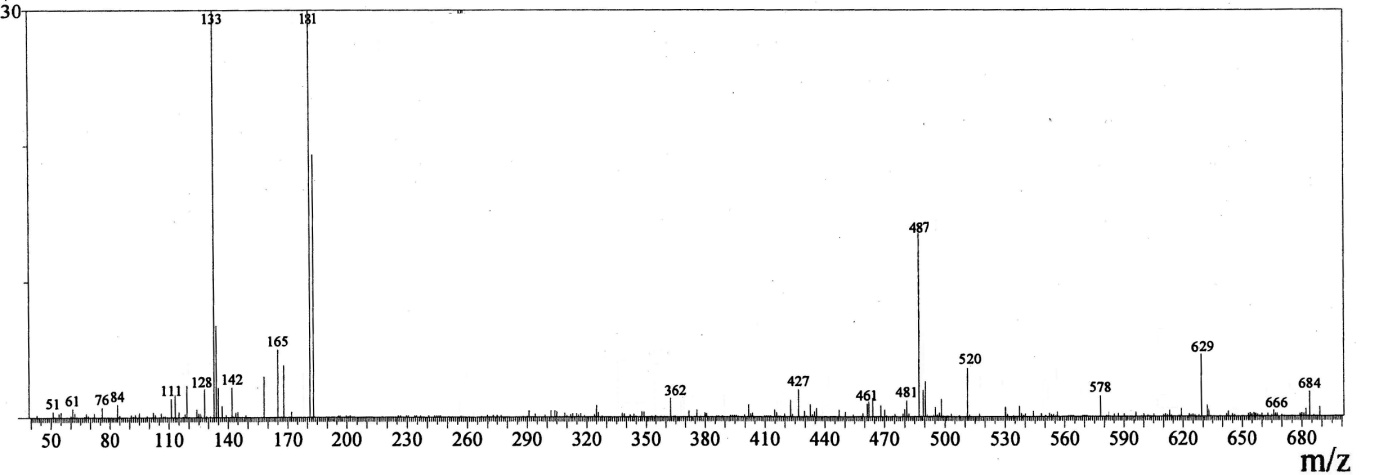
**

c. Cu(II) complex

Figure S2.Mass spectra of H4FPT, Ni(II) and Cu(II) complexes


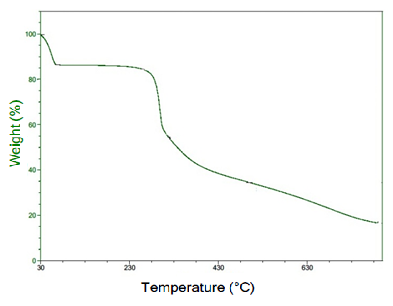


a. Ni(II) complex


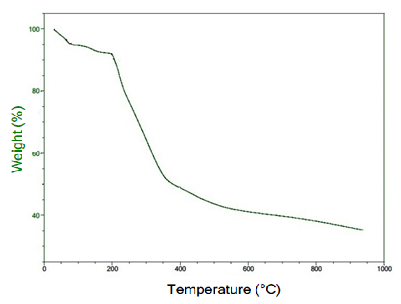


b. Cu(II) complex

Figure S3.Thermograms of Ni(II) and Cu(II) complexes


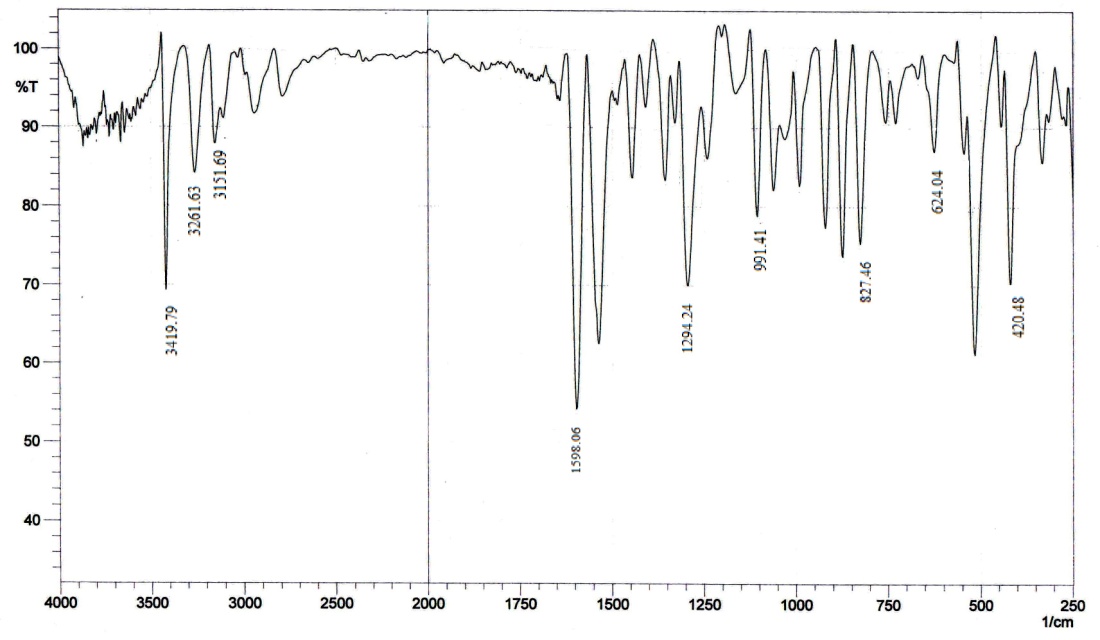


a. H4FPT (L)


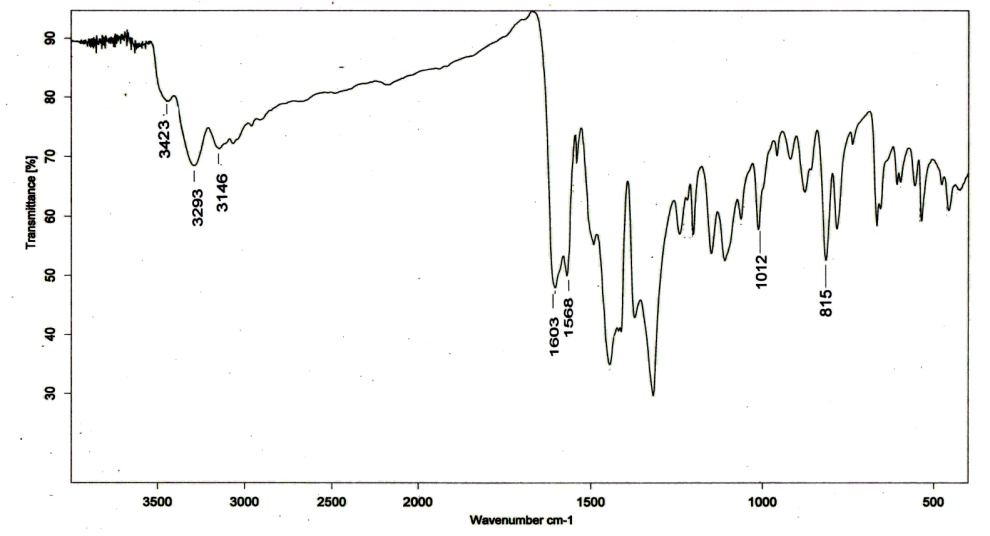


b. Ni(II) complex


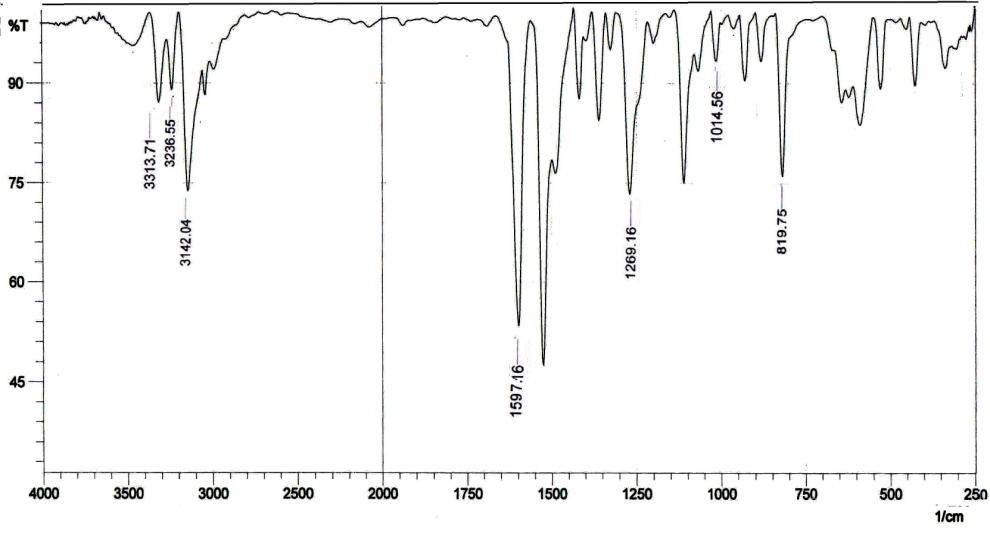


c. Cu(II) complex

Figure S4.IR Spectra of H4FPT, Ni(II) and Cu(II) complexes


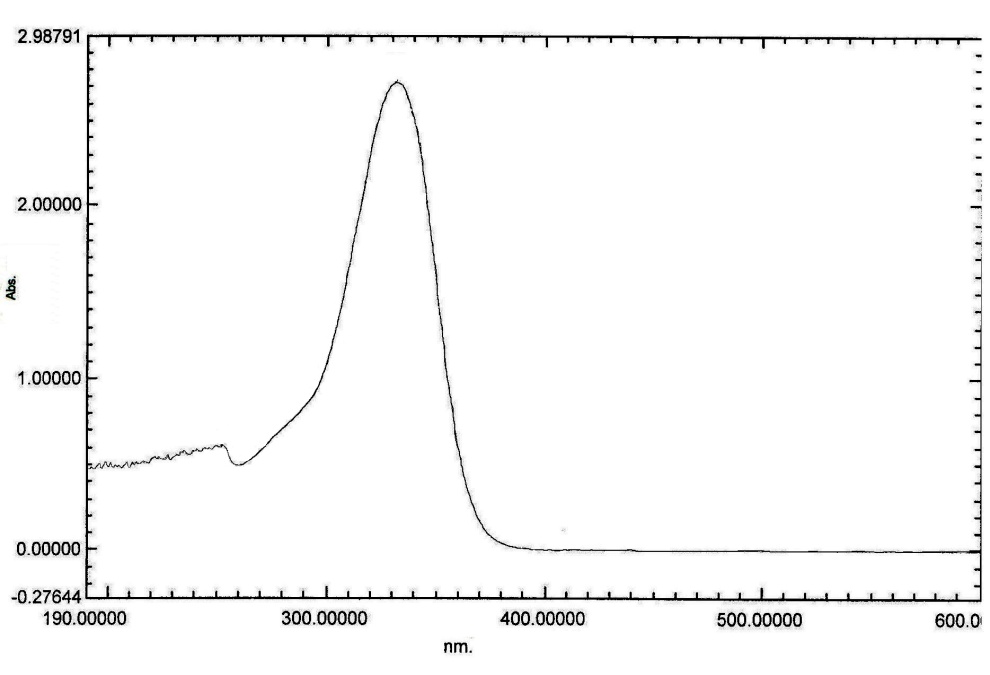


a. H4FPT (L)


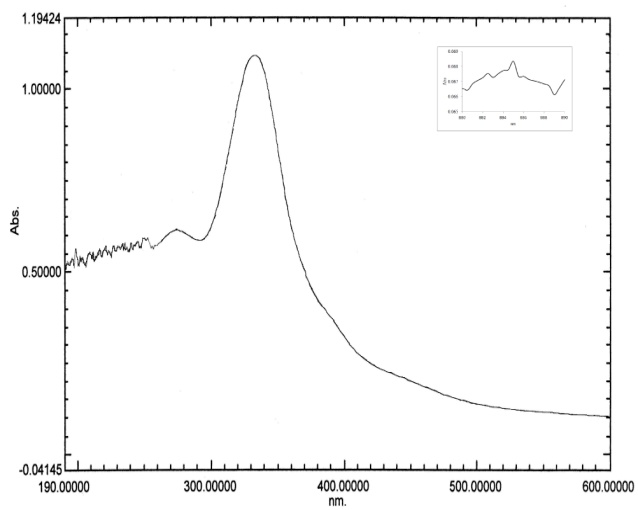


b. Ni(II) complex


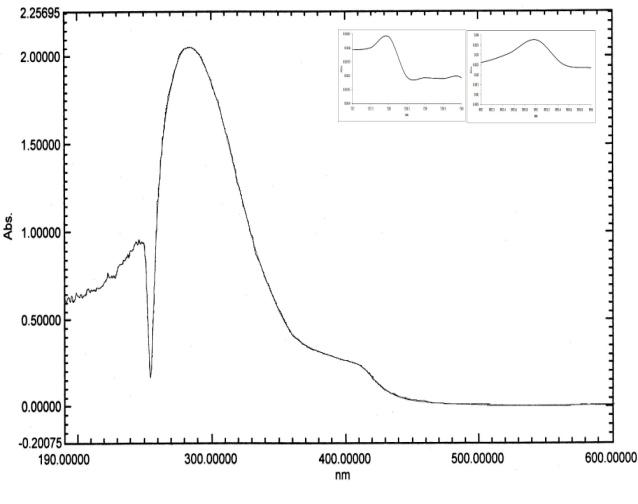


c. Cu(II) complex

Figure S5.UV-Visible Spectra of H4FPT, Ni(II) and Cu(II) complexes

Figure S6.ESR spectra of Cu(II) complex


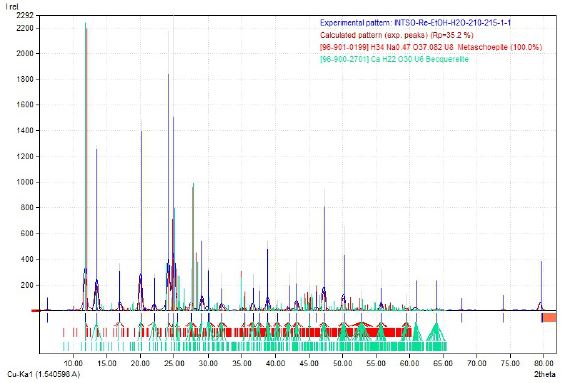


a. H4FPT (L)


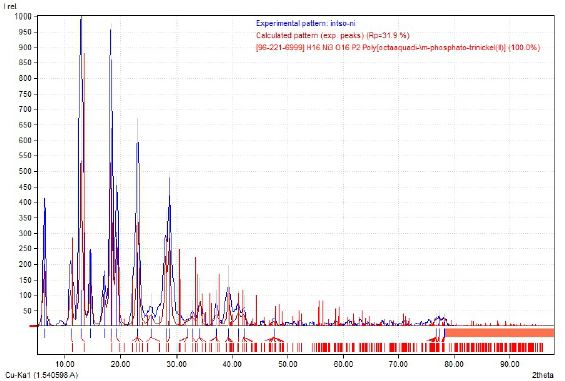


b. Ni(II) complex


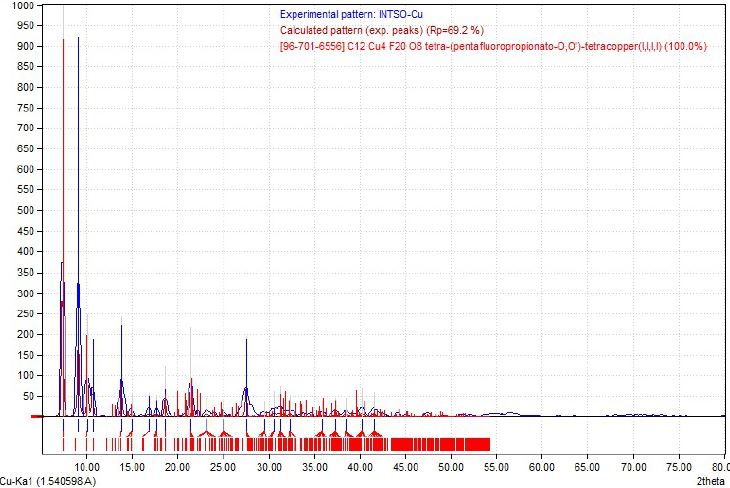


c. Cu(II) complex

Figure S7.Powder XRD of H4FPT, Ni(II) and Cu(II) complexes


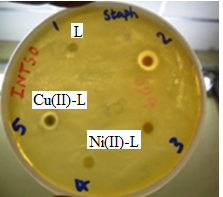

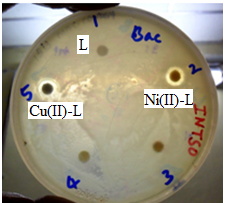


a) *S.aureus* b) *B.subtilis*


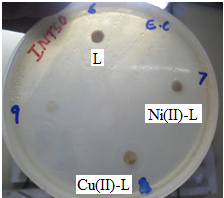

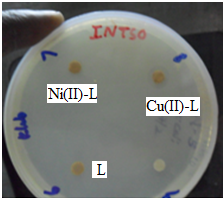


c) *E.coli* d) *K.pneumoniae*

Figure S8.Antibacterial activity of H4FPT (L) and its Ni(II) and Cu(II) complexes

with zone of inhibition in mm

Table S1: Data showing decrease in fluorescence emission with increase in concentration of the Ni(II)- H4FPTcomplex

| Concentration of the complex x10-6 M | % increase in Concentration | Intensity of emission | % decrease in Intensity |
| --- | --- | --- | --- |
| 0.78 | 96.85 | 81.88 | 1.78 |
| 1.55 | 47.74 | 80.43 | 1.25 |
| 2.29 | 31.35 | 79.42 | 3.81 |
| 3.01 | 23.14 | 76.39 | 1.79 |
| 3.70 | 18.25 | 75.03 | 1.08 |
| 4.38 | 14.98 | 74.22 | 1.35 |
| 5.04 | 12.67 | 73.22 | 1.20 |
| 5.67 | 10.93 | 70.14 | 3.10 |
| 6.29 | 9.58 | 70.04 | 0.08 |

Table S2: Data showing decrease in fluorescence emission with increase in concentration of the Cu(II)- H4FPTcomplex

| Concentration of the complex x10-6 M | Increase in % Concentration | Intensity of emission | Decrease in % Intensity |
| --- | --- | --- | --- |
| 0.78 | 96.85 | 77.12 | 0.26 |
| 1.55 | 47.74 | 76.92 | 2.03 |
| 2.29 | 31.35 | 75.35 | 2.35 |
| 3.01 | 23.14 | 73.58 | 1.68 |
| 3.70 | 18.25 | 72.34 | 1.23 |
| 4.38 | 14.98 | 71.46 | 2.69 |
| 5.04 | 12.67 | 69.53 | 1.16 |
| 5.67 | 10.93 | 68.74 | 1.14 |
| 6.29 | 9.58 | 67.94 | 1.96 |
